# Supplementary material
Source: publisher site journal article supplement (http://www.kjim.org/upload/media/kjim-2017-034-suppl3.pdf)
Supplement: Supplementary file 1 [file kjim-2017-034-suppl3.pdf]

**Supplementary Table 3. Ranges of coefficients of variance for the six analytes at all concentrations**

| Test item         | CAP 2015 results |                     | Current investigation |                     |
|-------------------|------------------|---------------------|-----------------------|---------------------|
|                   | CV, %            | No. of participants | CV, %                 | No. of participants |
| Total cholesterol | 3.0-3.4          | 4,524-4,536         | 0.9-3.7               | 10                  |
| HDL-C             | 11.4-29.2        | 4,430-4,445         | 1.5-8.1               | 10                  |
| LDL-C             | 15.1-29.9        | 2,525-2,542         | 1.4-15.2              | 10                  |
| Triglycerides     | 4.4-5.1          | 4,510-4,545         | 1.7-16.5              | 10                  |
| Creatinine        | 3.9-15.5         | 5,427-5,449         | 1.3-14.5              | 10                  |
| Glucose           | 3.2-9.2          | 5,425-5,448         | 0.4-4.2               | 10                  |

Values are presented as range.

CAP, College of American Pathologists; CV, coefficient of variation; HDL-C, high density lipoprotein cholesterol; LDL-C, low density lipoprotein cholesterol.
